# Supplementary material
Source: PubMed Central journal article supplement (PMC6607913)
Supplement: NIHMS1023711-supplement-Supplemental_information.pdf [file NIHMS1023711-supplement-Supplemental_information.pdf]

# Supporting Information

## **A flow extension tethered particle motion assay for single-molecule proteolysis**

Andrew A. Drabek, Joseph J. Loparo,\* and Stephen C. Blacklow\*

Department of Biological Chemistry and Molecular Pharmacology, Harvard Medical School, Boston, Massachusetts  
02115, United States

\*To whom correspondence should be addressed. E-mail: [loseph\\_loparo@hms.harvard.edu](mailto:loseph_loparo@hms.harvard.edu) and  
[stephen\\_blacklow@hms.harvard.edu](mailto:stephen_blacklow@hms.harvard.edu)

Contents

Supporting Tables S1-S2, Figures S1-S2, Legends for Supporting Movies V1-V2.

**Table S1. Relationship between DNA substrate binding density and trajectory mobility**

| <i>[substrate], pM</i> | <i>Total beads per<br/>fov, count*</i> | <i>Trackable<br/>trajectories per fov,<br/>count*</i> | <i>Fully mobile<br/>trajectories*</i> |
|------------------------|----------------------------------------|-------------------------------------------------------|---------------------------------------|
| 0.2                    | 641 ± 93                               | 298 ± 63                                              | 60.3 ± 6.5%                           |
| 1                      | 1,308 ± 218                            | 418 ± 114                                             | 27.9 ± 9.3%                           |
| 5                      | 2,561 ± 202                            | 1,038 ± 239                                           | 3.2 ± 1.4%                            |
| 25                     | 2,475 ± 409                            | 1,206 ± 346                                           | 0.3 ± 0.1%                            |

\*n = 3, reported as mean ± S.E.M.

**Table S2. Peptides, oligonucleotides<sup>a</sup>, oligonucleotide-peptide conjugates<sup>b</sup>, and fluorogenic peptides used in this study.**

| <i>Biopolymer ID</i>            | <i>Sequence</i>                                                                  | <i>Description</i>                                                   | <i>Source</i> |
|---------------------------------|----------------------------------------------------------------------------------|----------------------------------------------------------------------|---------------|
| peptide 1                       | H <sub>2</sub> N-GGG[K-(5-FAM)]GC-COOH                                           | Sortase donor peptide with ε-[5-amino-fluorescein (5-FAM)]-Lys (6aa) | Genscript     |
| peptide 2                       | H <sub>2</sub> N-CNIPYKIEAVQSLPATGGH-COOH                                        | Human Notch1 S2 containing peptide (19aa)                            | Genscript     |
| peptide 3                       | H <sub>2</sub> N-CGENLYFQGLPRTGGH-COOH                                           | TEV consensus containing peptide (16 aa)                             | Genscript     |
| oligo-peptide conjugate 1 (1)   | H <sub>2</sub> N-GGG{K-(5-FAM)}G{C-[SMCC-HN-(oligo 1)-3']}-COOH                  | Polyglycine-oligonucleotide Sortase donor peptide (6 aa-17 nt)       | This study    |
| oligo-peptide conjugate 2-N (2) | H <sub>2</sub> N-CNIPYKIEAVQSLPAT-GGG[K-(5-FAM)]G{C-[SMCC-HN-(oligo 1)-3']}-COOH | Notch1 S2 oligo-peptide conjugate, intermediate (20 nt-23 aa-17 nt)  | This study    |
| oligo-peptide conjugate 2-T (2) | H <sub>2</sub> N-CGENLYFQGLPRT-GGG{K-(5-FAM)}G{C-[SMCC-HN-(oligo 1)-3']}-COOH    | TEV oligo-peptide conjugate, intermediate (20 nt-19 aa-17 nt)        | This study    |
| oligo-peptide-conjugate 3-N (3) | H <sub>2</sub> N-{{3'-(oligo 2)-NH-SMCC}-C}-NIPYKIEAVQSLPAT-GGG{K-(5-FAM)}G{C-   | Notch1 S2 double oligo-peptide conjugate (20 nt-23 aa-17 nt)         | This study    |

|                                       |                                                                                                                          |                                                                                                                                     |            |
|---------------------------------------|--------------------------------------------------------------------------------------------------------------------------|-------------------------------------------------------------------------------------------------------------------------------------|------------|
|                                       | (SMCC-HN-(oligo 1)-3')-<br>COOH                                                                                          |                                                                                                                                     |            |
| oligo-peptide<br>conjugate 3-T<br>(3) | H <sub>2</sub> N-{{3':(oligo 2)-NH-<br>SMCC]-Cys}-<br>GENLYFQGLPRTGGG[K-(5-<br>FAM)]G{C-[SMCC-HN-<br>(oligo 1)-3']}-COOH | TEV double oligo-peptide<br>conjugate<br>(20 nt-19 aa-17 nt)                                                                        | This study |
| oligonucleotide 1                     | /5AmMC6/GTAAAACGACG<br>GCCAGT                                                                                            | 5'-amino-oligonucleotide,<br>from M13F sequencing<br>primer (17 nt)                                                                 | IDT        |
| activated<br>oligonucleotide 1        | 4-(N-maleimidomethyl)-<br>cyclohexane-1-amide-HN-5'-<br>(oligo 1)                                                        | 5'-maleimide-oligonucleotide<br>1 (17 nt)                                                                                           | This study |
| oligonucleotide 2                     | /5AmMC6/G*TCAGAGGTG<br>GCGAAACCC                                                                                         | 5'-amino-oligonucleotide,<br>derived from pUC19 vector<br><i>ori</i> (19 nt) * indicates<br>phosphoramidite bond                    | IDT        |
| activated<br>oligonucleotide 2        | 4-(N-maleimidomethyl)-<br>cyclohexane-1-amide-HN-5'-<br>(oligo 2)                                                        | 5'-maleimide-oligonucleotide<br>2 (20 nt)                                                                                           | This study |
| oligonucleotide 3                     | CTAGACTGGCCGTCGTTT<br>TAC                                                                                                | 5' XbaI overhang-containing<br>bridging oligonucleotide,<br>contains the reverse-<br>complement to M13F primer<br>(oligo 1) (21 nt) | IDT        |

|                   |                                                                                                    |                                                                                                                                                                          |     |
|-------------------|----------------------------------------------------------------------------------------------------|--------------------------------------------------------------------------------------------------------------------------------------------------------------------------|-----|
| oligonucleotide 4 | /5DigN/CAGGGTCGGAAC<br>AGGAGAGC                                                                    | 5'-digoxigenin-<br>oligonucleotide from the<br>pUC19 <i>ori</i> , HPLC purified<br>(20 nt)                                                                               | IDT |
| oligonucleotide 5 | GCTTAATTAACGACAGGA<br>CTATAAAGATAACCAGGCGT<br>TTCCCCCTGGAAGCTCCC<br>TCGTGCGCTCTCCTGTTC<br>CGACCCTG | Forward strand of the 100 bp<br>duplex from pUC19 <i>ori</i> , with<br>3' overhang complimentary<br>to dig-oligonucleotide 4,<br>contains a unique PacI site<br>(81 nt)  | IDT |
| oligonucleotide 6 | GCACGAGGGAGCTTCCAG<br>GGGGAACGCCTGGTATC<br>TTTATAGTCCTGTCGTAA<br>TTAAGCGTTTCGCCACC<br>TCTGAC       | Reverse strand of the 100 bp<br>duplex from pUC19 <i>ori</i> with<br>3' overhang complimentary<br>to oligonucleotides 2 and 8,<br>contains a unique PacI site<br>(80 nt) | IDT |
| oligonucleotide 7 | GGGCGGCGACCT/3BioTE<br>G/                                                                          | 3'-biotin-oligonucleotide<br>from $\lambda$ phage cohesive site,<br>cosR (12 nt)                                                                                         | IDT |
| oligonucleotide 8 | CTAGGTCAGAGGTGGCGA<br>AACCC                                                                        | 5' XbaI overhang-containing<br>bridging oligonucleotide<br>from pUC19 vector <i>ori</i> , for<br>the all-DNA substrate (23 nt)                                           | IDT |

<sup>a</sup> Listed 5' to 3'. Purified by desalting except where HPLC purification is indicated.

<sup>b</sup> SMCC: the portion of crosslinker remaining after Sulfo-SMCC reaction with an amino oligo (R<sub>1</sub>) and cysteine (C) containing peptide (R<sub>2</sub>).

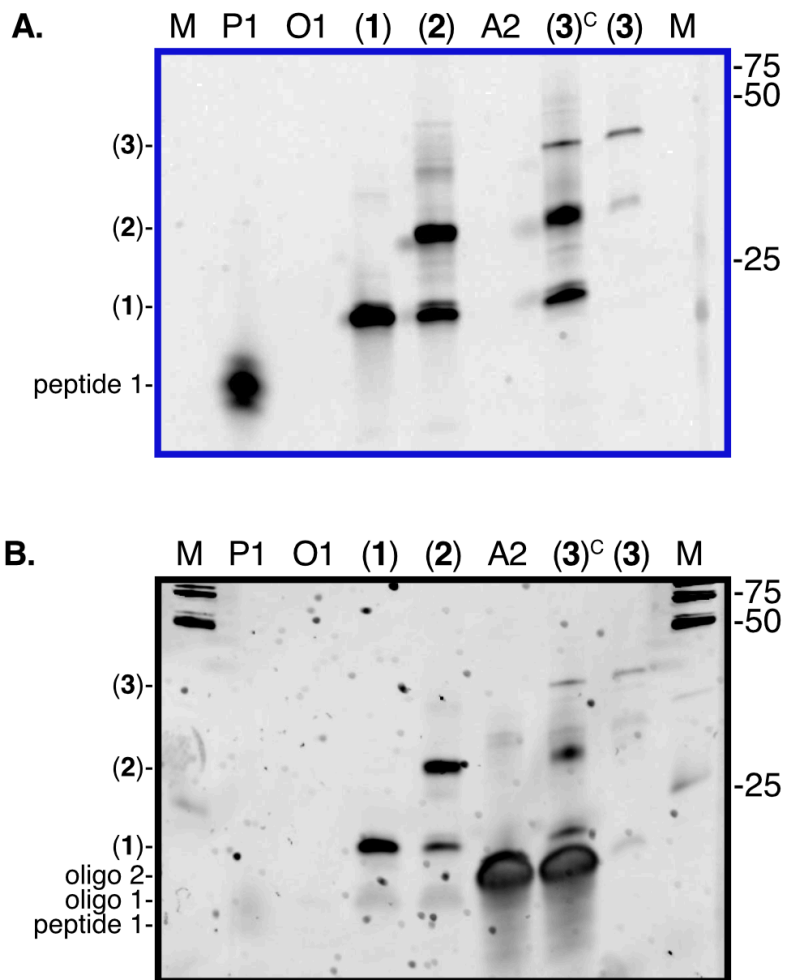

**Figure S1. SDS-PAGE analysis of the double oligo-peptide conjugate intermediate for TEV cleavage.** 15% TBE-Urea PAGE analysis showing: (A) in gel fluorescence of an unstained gel to detect the fluorescein label, and (B) in gel UV excitation fluorescence, of a SybrSafe stained gel to enable DNA detection. Abbreviations above lanes: M, low MW DNA marker (NEB); P1, peptide 1; O1, oligonucleotide 1; (1) oligo-peptide conjugate 1; (2) partially purified oligo-peptide conjugate 2-T; A2, activated oligonucleotide 2; (3)<sup>C</sup> crude double oligo-peptide conjugate 3-T; (3) double oligo-peptide conjugate 3-T.

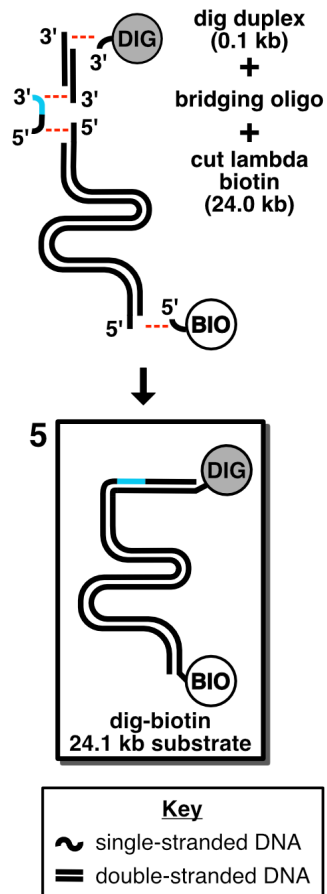

**Figure S2. Scheme for assembly of DNA-only control substrate.** Product (5) (boxed) is produced by annealing and ligation of a 5' digoxigenin-containing oligonucleotide, a short (100 bp) DNA duplex, a bridging oligonucleotide (oligonucleotide 8, cyan and black), the XbaI-cleaved 24.5 kbp fragment of phage  $\lambda$ , and a terminal biotinylated oligonucleotide.

## Legends for Supporting Movies V1 and V2

**Supporting Movie V1. Flow extension of all-DNA substrate (5) captured at 0.2 pM.** The frame rate is 45 fps. Scale bar is 10 microns. Flow is from left to right. Flow starts at ~8 sec.

**Supporting Movie V2. Single molecule proteolysis of TEV consensus DNA-peptide conjugate (4) with TEV protease.** The frame rate is 45 fps. Scale bar is 10 microns. Flow is from left to right. Flow starts at ~8 sec. Cleavage starts at ~16 sec.
